# Supplementary material
Source: PubMed Central journal article supplement (PMC7744118)
Supplement: NIHMS1652412-supplement-1.pdf [file NIHMS1652412-supplement-1.pdf]

**Supplementary Tables:**

**Table S1:** Baseline characteristics of patients who received heart transplant for light chain (AL) or transthyretin (ATTR) cardiac amyloidosis, separated by era. Early Era, 2001-1007; Late Era 2008-2018.

|                                  | AL               |                  |                 | ATTR              |                   |                 |
|----------------------------------|------------------|------------------|-----------------|-------------------|-------------------|-----------------|
|                                  | Early Era        | Late Era         | <i>p</i> -value | Early Era         | Late Era          | <i>p</i> -value |
| <b>Demographics</b>              | ( <i>n</i> = 12) | ( <i>n</i> = 6)  |                 | ( <i>n</i> =6)    | ( <i>n</i> =15)   |                 |
| Female, n (%)                    | 6 (50.0)         | 1 (16.7)         | 0.32            | 2 (33.3)          | 2 (33.3)          | 0.54            |
| Age at OHT, years                | 52 (47.8-56.3)   | 59 (55.3-62.0)   | 0.38            | 60.5 (53.5-63.8)  | 63 (58.5-66.0)    | 0.50            |
| Diagnosis to OHT, days           | 116 (74.8-148.5) | 643 (375-1231)   | 0.03            | 162 (698.8-340.5) | 389 (245.5-861.5) | 0.08            |
| Listing to OHT, days             | 33 (22-107)      | 66 (58-331)      | 0.55            | 48.5 (40.8-76.3)  | 70.5 (37.0-149.0) | 0.78            |
| <b>Laboratory</b>                |                  |                  |                 |                   |                   |                 |
| BMI, kg/ m <sup>2</sup>          | 26.1 (24.4-28.6) | 25.4 (24.8-26.2) | 0.88            | 25.4 (24.8-26.2)  | 27 (24.6-28.9)    | 0.11            |
| mBMI, kg/m <sup>2</sup>          | 939 (835-1080)   | 1170 (1090-1230) | 0.06            | 1170 (1090-1230)  | 1110 (997-1250)   | 0.08            |
| Creatinine, mg/dL                | 1.1 (1.0-1.5)    | 1.3 (1.1-1.7)    | 0.93            | 1.5 (0.9-2.1)     | 1.3 (1.1-1.5)     | 0.76            |
| eGFR, ml/min/1.73 m <sup>2</sup> | 54.3 (45.1-66.7) | 59.7 (46.8-71.7) | 0.24            | 47.6 (35.7-77.8)  | 60.6 (47.1-71.8)  | 0.38            |
| Serum albumin, g/L               | 3.7 (3.3-4.0)    | 4.6 (4.3-4.7)    | 0.01            | 4.2 (4.0-4.3)     | 4.2 (4.1-4.4)     | 0.93            |

|                           |               |                   |      |                  |               |      |
|---------------------------|---------------|-------------------|------|------------------|---------------|------|
| Total Bilirubin, mg/dL    | 0.9 (0.5-1.1) | 0.8 (0.7-0.9)     | 0.76 | 0.8 (0.7-0.9)    | 0.9 (0.7-1.2) | 0.18 |
| Alkaline Phosphatase, U/L | 104 (92-114)  | 88.5 (77.5-102.0) | 0.17 | 104 (80.5-125.0) | 80 (68.5-122) | 0.51 |

| <b>Clinical Data</b>         |           |           |      |           |           |      |
|------------------------------|-----------|-----------|------|-----------|-----------|------|
| Average NYHA class           | 3.6 ± 0.5 | 3.5 ± 0.6 | 0.79 | 3.8 ± 0.4 | 3.7 ± 0.5 | 0.67 |
| Hypertension, n (%)          | 4 (33)    | 2 (33.3)  | 1.00 | 3 (50)    | 6 (40)    | 1.00 |
| Diabetes, n (%)              | 3 (25)    | 1 (16.7)  | 1.00 | 2 (33.3)  | 1 (6.7)   | 0.18 |
| CAD, n (%)                   | 3 (25)    | 3 (50)    | 0.34 | 1 (16.7)  | 5 (33.3)  | 0.62 |
| Peripheral neuropathy, n (%) | 0 (0)     | 1 (16.7)  | 0.33 | 2 (33.3)  | 4 (26.7)  | 1.00 |
| Organs affected              |           |           | 1.00 |           |           | 0.18 |
| Isolated cardiac, n (%)      | 9 (75)    | 5 (83.33) |      | 4 (66.7)  | 14 (93.3) |      |
| 2 organs affected, n (%)     | 3(25)     | 1 (16.67) |      | 2 (33.3)  | 1 (6.7)   |      |

AL= light chain amyloidosis; ATTR = transthyretin amyloidosis; mBMI = modified body mass index; CAD = coronary artery disease; eGFR, by MDRD equation = estimated glomerular filtration rate; mBMI = modified body mass index; MDRD = modification of diet in renal disease; NYHA = New York Heart Association Class; OHT = orthotopic heart transplantation. Values are given as median (25<sup>th</sup>-75<sup>th</sup> percentile), mean ± standard deviation, or counts (%)

**Table S2:** Treatment Regimens and Management of Light-Chain Cardiac Amyloidosis

Patients

| <b>AL Subject #</b> | <b>Era</b> | <b>SCT</b> | <b>Chemotherapy Regimen</b> | <b>Induction<sup>a</sup></b> | <b>Consolidation<sup>b</sup></b> |
|---------------------|------------|------------|-----------------------------|------------------------------|----------------------------------|
| 1                   | Early      | Y          | M, 140 mg/m <sup>2</sup>    | n/a                          | n/a                              |
| 2                   | Early      | Y          | M, 140 mg/m <sup>2</sup>    | n/a                          | n/a                              |
| 3                   | Early      | Y          | M, 140 mg/m <sup>2</sup>    | n/a                          | n/a                              |
| 4                   | Early      | Y          | M, 140 mg/m <sup>2</sup>    | n/a                          | n/a                              |
| 5                   | Early      | N          | Fludarabine                 | n/a                          | n/a                              |
| 6                   | Early      | Y          | M, 140 mg/m <sup>2</sup>    | n/a                          | Len, Cy, Dexa                    |
| 7 <sup>c</sup>      | Early      | Y          | M, 140 mg/m <sup>2</sup>    | n/a                          | n/a                              |
| 8                   | Early      | Y          | M, 140 mg/m <sup>2</sup>    | n/a                          | n/a                              |
| 9                   | Early      | Y          | M, 140 mg/m <sup>2</sup>    | n/a                          | n/a                              |
| 10                  | Early      | Y          | M, 140 mg/m <sup>2</sup>    | n/a                          | n/a                              |
| 11                  | Early      | Y          | M, 200 mg/m <sup>2</sup>    | n/a                          | n/a                              |
| 12                  | Early      | Y          | M, 200 mg/m <sup>2</sup>    | n/a                          | n/a                              |
| 13                  | Late       | N          | Len, Dexa, Bor, oral M      | n/a                          | n/a                              |
| 14                  | Late       | Y          | M, 140 mg/m <sup>2</sup>    | n/a                          | CyBorD, Dara                     |
| 15                  | Late       | Y          | M, 140 mg/m <sup>2</sup>    | n/a                          | Thal, Dexa, Bor                  |
| 16 <sup>c</sup>     | Late       | Y          | M, 140 mg/m <sup>2</sup>    | n/a                          | Bor, Dexa                        |
| 17                  | Late       | Y          | M, 140 mg/m <sup>2</sup>    | n/a                          | Bor, Dexa                        |
| 18 <sup>c</sup>     | Late       | Y          | M, 140 mg/m <sup>2</sup>    | CyBorD <sup>d</sup>          | Ixazomib, Dara, Dexa             |

AL = light chain amyloidosis; SCT = stem cell transplant; Bor = bortezomib; Cy = cyclophosphamide; CyBorD = Cyclophosphamide, bortezomib, dexamethasone; Dara = daratumumab; Dexamethasone; Len = lenalidomide; M = melphalan.

<sup>a</sup> Induction: defined as initial pre-stem cell transplant chemotherapy regimen

<sup>b</sup> Consolidation: defined as initial post-stem cell chemotherapy regimen

<sup>c</sup> Received SCT before heart transplant
